# Supplementary material for: Convalescent Plasma Efficacy in Life-Threatening COVID-19 Patients Admitted to the ICU: A Retrospective Cohort Study
Source: MDPI journal article supplement (doi:10.3390/jcm10102113), 2021-05-14
Supplement: s1 [file s1]

## Supplementary material

**Table S1.** Univariate Cox regression analysis to predict time to clinical improvement.

| Variables                                                                             | Hazard ratio (95% confidence interval) | p-value      |
|---------------------------------------------------------------------------------------|----------------------------------------|--------------|
| Convalescent plasma therapy, (refer: no)                                              | 0.75 (0.41-1.37)                       | 0.35         |
| Convalescent plasma with high neutralizing antibody titers $\geq 1:160$ , (refer: no) | 0.71 (0.32-1.56)                       | 0.40         |
| Age, year                                                                             | 0.97 (0.95-0.99)                       | <b>0.003</b> |
| Male, n (%)                                                                           | 1.15 (0.42-3.18)                       | 0.78         |
| Body mass index, $\text{kg.m}^{-2}$                                                   | 1.00 (0.95-1.04)                       | 0.91         |
| SOFA                                                                                  | 0.93 (0.86-0.99)                       | <b>0.04</b>  |
| SAPS II                                                                               | 0.97 (0.95-0.99)                       | <b>0.005</b> |
| Patients with comorbidities, (refer: no)                                              | 0.79 (0.47-1.31)                       | 0.37         |
| Comorbidities distribution, (refer: no)                                               |                                        |              |
| Diabetes mellitus                                                                     | 0.84 (0.51-1.39)                       | 0.50         |
| Hypertension                                                                          | 0.73 (0.44-1.23)                       | 0.24         |
| Chronic artery disease                                                                | 1.04 (0.38-2.85)                       | 0.94         |
| Chronic kidney disease                                                                | 1.53 (0.55-4.21)                       | 0.41         |
| Time from symptoms onset to ICU admission, day                                        | 1.01 (0.95-1.08)                       | 0.73         |
| Time from symptoms onset to CP administration, day                                    | 0.96 (0.91-1.02)                       | 0.22         |
| Vital signs on ICU admission                                                          |                                        |              |
| Temperature (max), $^{\circ}\text{C}$                                                 | 1.45 (0.88-2.39)                       | 0.15         |
| Heart rate, $\text{beats.min}^{-1}$                                                   | 1.00 (0.99-1.01)                       | 0.77         |
| Respiratory rate, $\text{breaths.min}^{-1}$                                           | 1.00 (0.97-1.03)                       | 0.89         |
| Laboratory data on ICU admission                                                      |                                        |              |
| C-reactive protein, $\text{mg.L}^{-1}$                                                | 1.00 (1.00-1.00)                       | 0.41         |
| Leucocytes count, $\times 10^9.\text{L}^{-1}$                                         | 0.94 (0.89-0.99)                       | <b>0.034</b> |
| Lymphocytes count, $\times 10^9.\text{L}^{-1}$                                        | 0.63 (0.34-1.17)                       | 0.14         |
| Platelet count, $\times 10^9.\text{L}^{-1}$                                           | 1.00 (1.00-1.00)                       | 0.76         |
| Procalcitonin, $\text{ng.mL}^{-1}$                                                    | 1.00 (0.99-1.01)                       | 0.94         |
| INR                                                                                   | 0.60 (0.19-1.93)                       | 0.39         |
| Activated partial thromboplastin time; s                                              | 0.99 (0.95-1.02)                       | 0.56         |
| D-dimer, $\mu\text{g.mL}^{-1}$                                                        | 0.78 (0.65-0.93)                       | <b>0.006</b> |
| Fibrinogen, $\text{g.L}^{-1}$                                                         | 0.98 (0.84-1.13)                       | 0.75         |
| Ferritin, $\mu\text{g.L}^{-1}$                                                        | 1.00 (1.00-1.00)                       | 0.84         |
| Interleukin 6, $\text{ng.L}^{-1}$                                                     | 1.00 (1.00-1.00)                       | 0.18         |

|                                                       |                     |                  |
|-------------------------------------------------------|---------------------|------------------|
| Alanine aminotransferase, IU.mL <sup>-1</sup>         | 1.00 (0.99-1.00)    | 0.93             |
| Aspartate aminotransferase, IU.mL <sup>-1</sup>       | 0.99 (0.99-1.00)    | <b>0.08</b>      |
| Total bilirubin, µmol.L <sup>-1</sup>                 | 0.98 (0.96-1.00)    | 0.13             |
| Creatinine, µmol.L <sup>-1</sup>                      | 1.00 (1.00-1.00)    | 0.65             |
| PaO <sub>2</sub> /FiO <sub>2</sub> ratio, mmHg        | 1.004 (1.001-1.007) | <b>0.008</b>     |
| Lactate, mmol.L <sup>-1</sup>                         | 0.49 (0.28-0.87)    | <b>0.01</b>      |
| <b>Treatments (refer: no)</b>                         |                     |                  |
| Invasive mechanical ventilation (reference: HFNO/NIV) | 0.31 (0.18-0.51)    | <b>&lt;0.001</b> |
| Vasopressor support                                   | 0.26 (0.16-0.44)    | <b>&lt;0.001</b> |
| Renal replacement therapy                             | 0.30 (0.16-0.57)    | <b>&lt;0.001</b> |
| Extracorporeal membrane oxygenation                   | -                   |                  |
| Tocilizumab                                           | 0.89 (0.42-1.88)    | 0.77             |
| Hydroxychloroquine                                    | 1.41 (0.86-2.33)    | 0.17             |
| Favipiravir                                           | 1.14 (0.65-2.01)    | 0.65             |
| Lopinavir/ritonavir                                   | 1.22 (0.71-2.10)    | 0.46             |
| Methylprednisolone                                    | 1.00 (0.61-1.63)    | 0.99             |
| <b>WHO scale 5 (refer: WHO scale 4)</b>               | 0.69 (0.41-1.14)    | 0.14             |

SOFA, Sequential Organ Failure Assessment; SAPS, Simplified Acute Physiology Score; ICU, intensive care unit; PaO<sub>2</sub>, arterial oxygen pressure; FiO<sub>2</sub>, inspiratory oxygen fraction; INR, international normalized ratio; WHO, World Health Organization; HFNO, high flow nasal oxygen; NIV, non-invasive therapy.

**Table S2.** Multivariable Cox regression analysis to predict time to clinical improvement.

| Variables                                                                      | Hazard ratio | 95% Confidence interval | P-value      |
|--------------------------------------------------------------------------------|--------------|-------------------------|--------------|
| Convalescent plasma with high neutralizing antibody titers ≥ 1:160 (refer: no) | 1.05         | 0.40-2.72               | 0.92         |
| Age, year                                                                      | 0.97         | 0.95-1.00               | 0.063        |
| Male, (refer: female)                                                          | 1.10         | 0.26-4.66               | 0.89         |
| BMI, kg.m <sup>-2</sup>                                                        | 0.99         | 0.92-1.06               | 0.72         |
| SOFA score                                                                     | 1.03         | 0.90-1.18               | 0.68         |
| Lactate, mmol.L <sup>-1</sup>                                                  | 0.73         | 0.38-1.38               | 0.33         |
| Leucocytes count, × 10 <sup>9</sup> .l <sup>-1</sup>                           | 1.02         | 0.94-1.10               | 0.68         |
| PaO <sub>2</sub> /FiO <sub>2</sub> ratio, mmHg                                 | 1.00         | 0.99-1.00               | 0.94         |
| D-dimer, µg.mL <sup>-1</sup>                                                   | 1.00         | 0.74-1.38               | 0.95         |
| Aspartate aminotransferase, IU.mL <sup>-1</sup>                                | 0.99         | 0.98-1.00               | 0.051        |
| Time from symptoms onset to convalescent plasma infusion, day                  | 0.98         | 0.90-1.06               | 0.60         |
| Invasive mechanical ventilation, (refer: HFNO/NIV)                             | 0.59         | 0.23-1.48               | 0.26         |
| Vasopressor support (refer: no)                                                | 0.45         | 0.21-0.99               | <b>0.047</b> |
| Renal replacement therapy (refer: no)                                          | 0.44         | 0.15-1.26               | 0.13         |
| Methylprednisolone, (refer: no)                                                | 0.99         | 0.55-1.80               | 0.98         |
| Tocilizumab, (refer: no)                                                       | 1.21         | 0.38-3.78               | 0.75         |
| Extracorporeal oxygenation membrane, (refer: no)                               | -            | -                       | -            |
| Comorbidities, (refer: no)                                                     | 0.79         | 0.43-1.45               | 0.44         |

HFNO, high flow oxygen; NIV, non-invasive ventilation; PaO<sub>2</sub>, arterial oxygen pressure; FiO<sub>2</sub>, inspiratory oxygen fraction; SOFA, Sequential Organ Failure Assessment. Test of proportional-hazards assumption (Shoenfeld residuals test): p=0.23.

**Table S3.** Weighted standardized differences.

| Variables                                                     | Weighted standardized differences (%) |
|---------------------------------------------------------------|---------------------------------------|
| Age, year                                                     | 14                                    |
| Male                                                          | 1                                     |
| BMI, kg.m <sup>-2</sup>                                       | 0.8                                   |
| SOFA score                                                    | 5.7                                   |
| Lactate, mmol.L <sup>-1</sup>                                 | 7.8                                   |
| Leucocytes count, × 10 <sup>9</sup> .l <sup>-1</sup>          | 1.4                                   |
| PaO <sub>2</sub> /FiO <sub>2</sub> ratio, mmHg                | 18.5                                  |
| D-dimer, µg.mL <sup>-1</sup>                                  | 8.8                                   |
| Aspartate aminotransferase, IU.mL <sup>-1</sup>               | 10.0                                  |
| Time from symptoms onset to convalescent plasma infusion, day | 15.0                                  |
| Invasive mechanical ventilation                               | 15.4                                  |
| Vasopressor support                                           | 8.0                                   |
| Renal replacement therapy                                     | 18.9                                  |
| Methylprednisolone                                            | 16.0                                  |
| Tocilizumab                                                   | 20                                    |
| Extracorporeal oxygenation membrane                           | 0.02                                  |
| Comorbidities                                                 | 19.5                                  |

PaO<sub>2</sub>, arterial oxygen pressure; FiO<sub>2</sub>, inspiratory oxygen fraction; SOFA, Sequential Organ Failure Assessment.
